# Supplementary material for: Diabetes‐related foot disease research in Aotearoa New Zealand: a bibliometric analysis (1970–2020)
Source: Springer Nature journal article supplement (doi:10.1186/s13047-022-00528-5), 2022-01-01

# Additional File 1 - Significant policies/strategies/groups that have influenced NZ DRFD reasearch

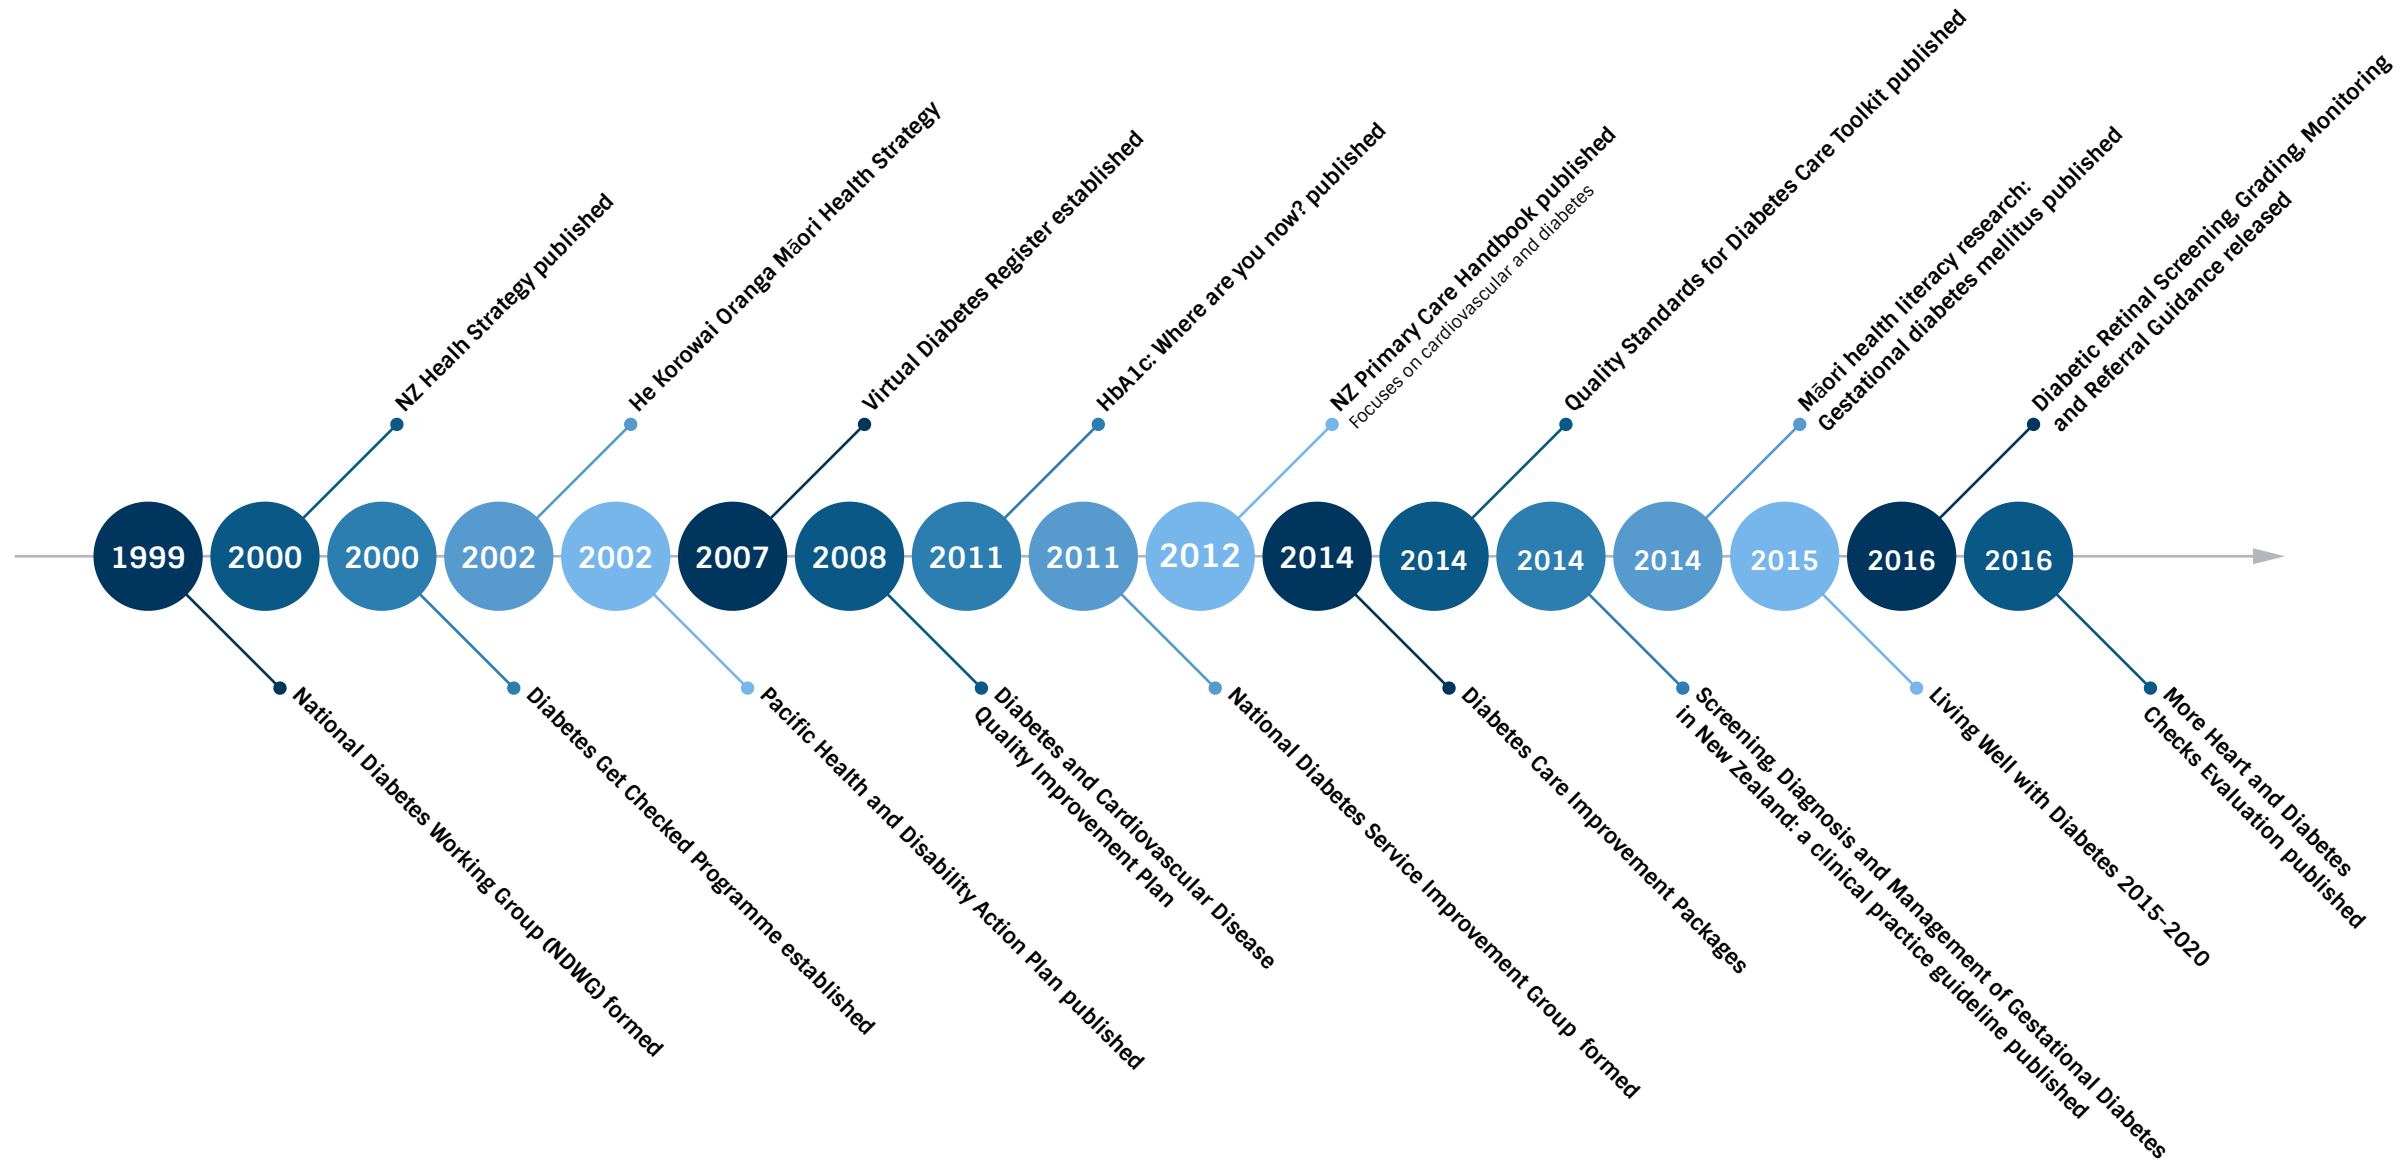

Supplement: MOESM1 [file 20241410]
